# Supplementary material for: Metabolomic machine learning predictor for diagnosis and prognosis of gastric cancer
Source: Springer Nature journal article supplement (doi:10.1038/s41467-024-46043-y), 2024-02-23
Supplement: MOESM1 [file 41467_2024_46043_MOESM1_ESM.pdf]

**Metabolomic machine learning predictor for diagnosis and prognosis of gastric cancer**

Yangzi Chen<sup>1,12</sup>, Bohong Wang<sup>1,2,12</sup>, Yizi Zhao<sup>1,12</sup>, Xinxin Shao<sup>3,12</sup>, Mingshuo Wang<sup>1,2,12</sup>, Fuhai Ma<sup>3,4,12</sup>, Laishou Yang<sup>5</sup>, Meng Nie<sup>1</sup>, Peng Jin<sup>3,6</sup>, Ke Yao<sup>1</sup>, Haibin Song<sup>7</sup>, Shenghan Lou<sup>5</sup>, Hang Wang<sup>5</sup>, Tianshu Yang<sup>8,9</sup>, Yantao Tian<sup>3\*</sup>, Peng Han<sup>10,11\*</sup>, Zeping Hu<sup>1,2\*</sup>

<sup>1</sup> School of Pharmaceutical Sciences, Tsinghua University, Beijing, 100084, China.

<sup>2</sup> Tsinghua-Peking Joint Center for Life Sciences, Tsinghua University, Beijing, 100084, China.

<sup>3</sup> National Cancer Center, National Clinical Research Center for Cancer, Cancer Hospital, Chinese Academy of Medical Sciences, Peking Union Medical College, Beijing, 100730, China.

<sup>4</sup> Department of General Surgery, Department of Gastrointestinal Surgery, Beijing Hospital, National Center of Gerontology, Institute of Geriatric Medicine, Chinese Academy of Medical Sciences, Beijing, 100730, China

<sup>5</sup> Department of Colorectal Surgery, Harbin Medical University Cancer Hospital, Harbin, 150081, China.

<sup>6</sup> Department of Gastroenterology, Tianjin Medical University Cancer Institute and Hospital, National Clinical Research Center for Cancer, Key Laboratory of Cancer Prevention and Therapy, Tianjin's Clinical Research Center for Cancer, Tianjin, 300060, China.

<sup>7</sup> Department of Gastrointestinal Surgery, Harbin Medical University Cancer Hospital, Harbin, 150081, China.

<sup>8</sup> Shanghai Key Laboratory of Metabolic Remodeling and Health, Institute of Metabolism and Integrative Biology, Institutes of Biomedical Sciences, Fudan University, Shanghai, 200032, China

23   <sup>9</sup> Shanghai Qi Zhi Institute, Shanghai, 200438, China

24   <sup>10</sup> Department of Oncology Surgery, Harbin Medical University Cancer Hospital, Harbin,  
25   150081, China.

26   <sup>11</sup> Key Laboratory of Tumor Immunology in Heilongjiang, Harbin, 150081, China.

27   <sup>12</sup> These authors contributed equally

28   \*Correspondence:

29   tianyantao@cicams.ac.cn (Y.T.); leospiv@hrbmu.edu.cn (P. H.); zeping\_hu@tsinghua.edu.cn  
30   (Z.H.)

## Supplementary Figures

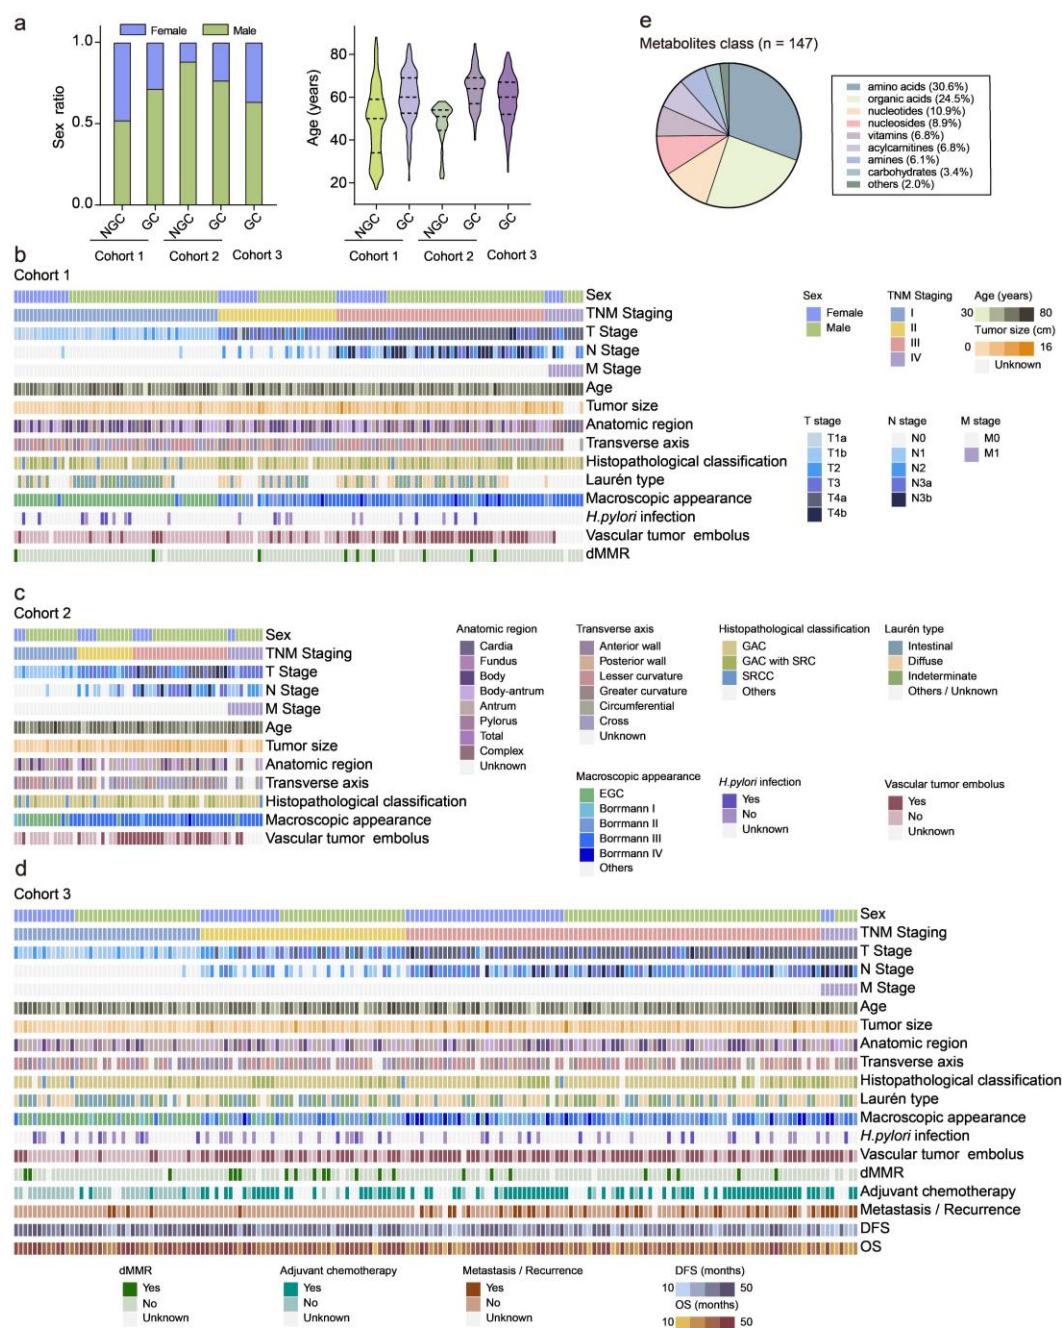

**Supplementary Fig. 1 | Participant recruitment and metabolites composition.**

**a-d**, Clinical characteristics of Cohort 1-3 subjects. The dashed lines represent the median and quartiles. **e**, Classes, and proportions of metabolites detected in the study. dMMR: Deficient mismatch repair, GAC: Gastric adenocarcinoma, SRC: Signet ring cell, SRCC: Signet ring cell cancer, EGC: Early gastric cancer. Source data are provided as a Source Data file.

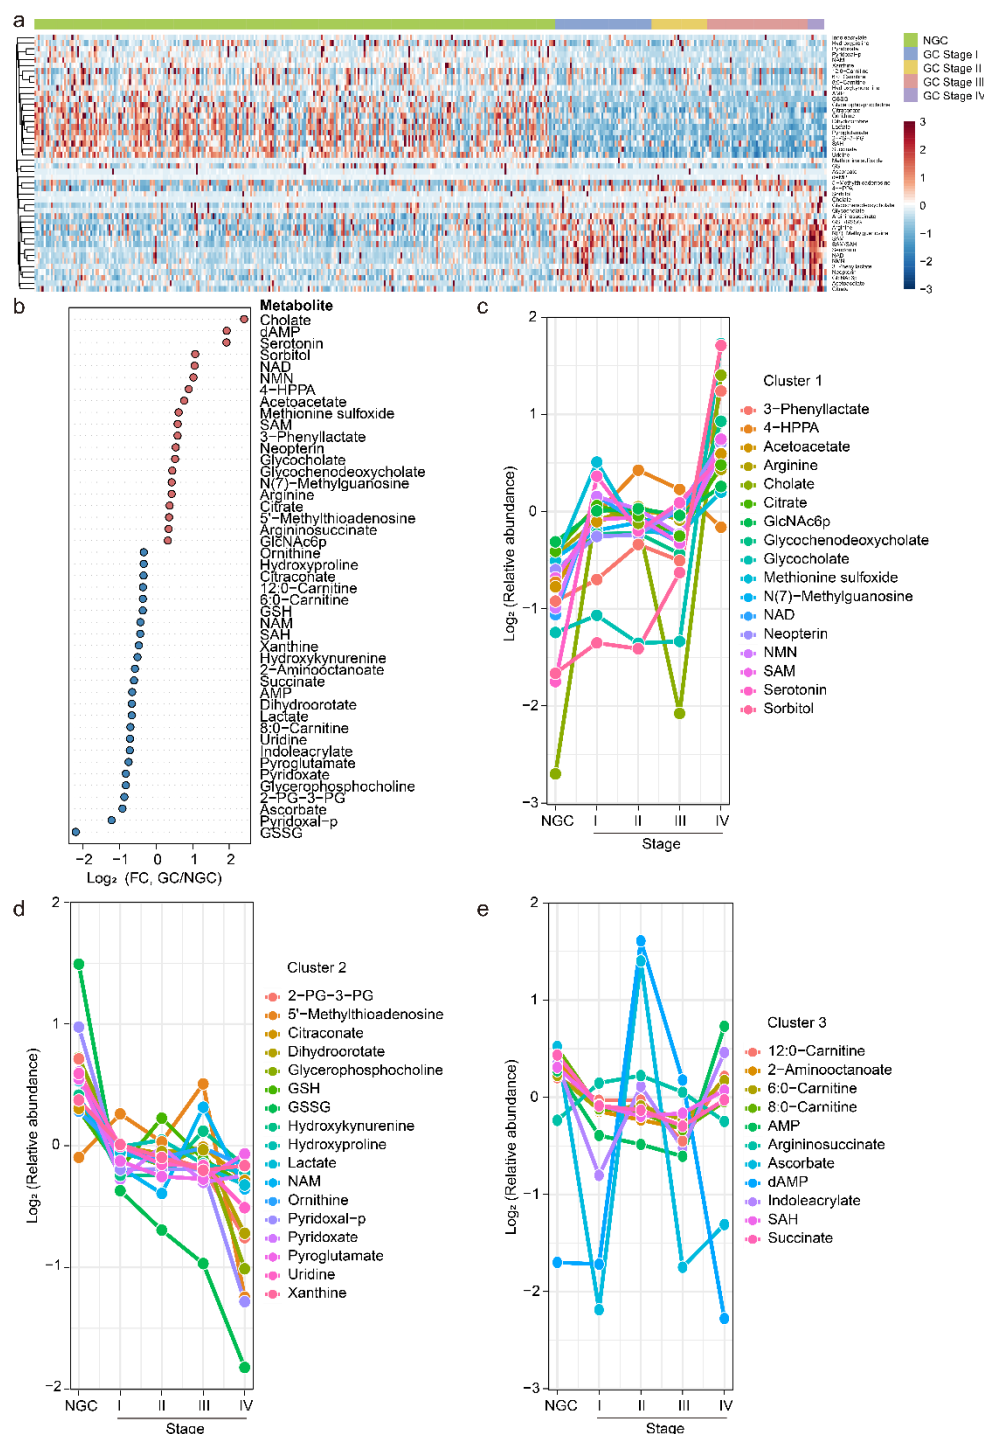

**Supplementary Fig. 2 | Metabolomics analysis of GC patients and NGC controls.**

**a**, Heatmap of differential metabolites between GC and NGC in Cohort 1. **b**, The differential metabolites in GC versus NGC. Two-sided Wilcoxon rank-sum tests followed by Benjamini-Hochberg (BH) multiple comparison test with false discovery rate (FDR) < 0.05 and fold change (FC) > 1.25 or < 0.8. Up-regulated metabolites in GC were colored in red while down-regulated metabolites were colored in blue. **c-e**,

Dynamic alterations of metabolites in clusters 1-3. The dots represent the mean log<sub>2</sub> relative abundance. Source data are provided as a Source Data file.

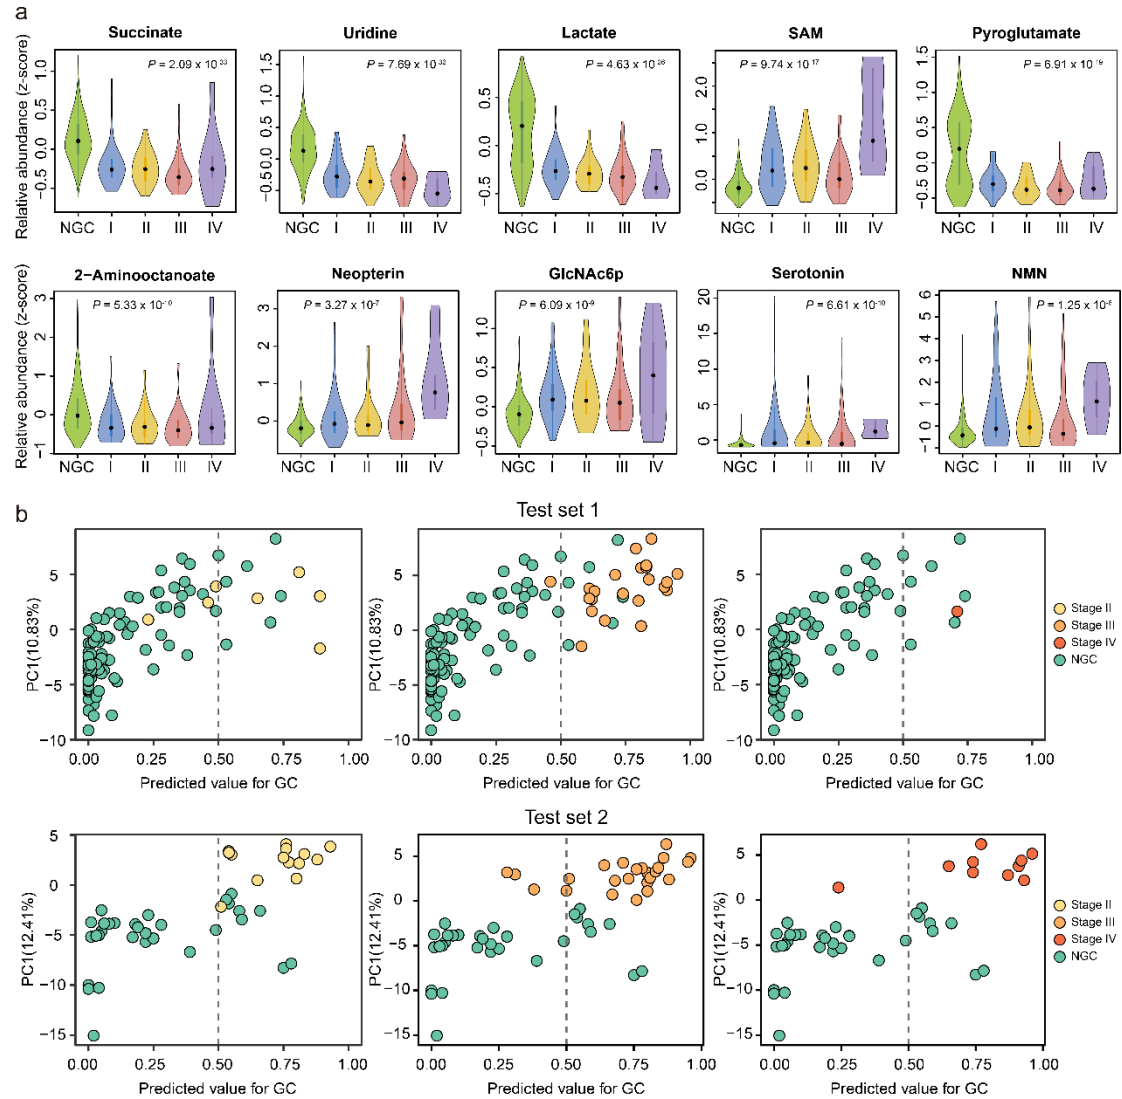

**Supplementary Fig. 3 | Metabolite distribution and performance evaluation of the 10-DM model.**

**a**, Violin plots of the modeling metabolites using relative abundance (the z-score transformed original normalized peak area) among Cohort 1, including NGC (n=281) and GC (Stage I, n=52; Stage II, n=30; Stage III, n=53; Stage IV, n=10) plasma samples. The differences were calculated using the two-sided Kruskal-Wallis test. Black dots represent population medians. **b**, The prediction performance of the 10-DM model for distinguishing stage II/III/IV GC (colored in yellow, orange and red) from NGC in test sets 1 and 2. The dotted line represented the cut-off value of 0.50 used to separate the predicted NGC (on the left side) from GC (on the right side).

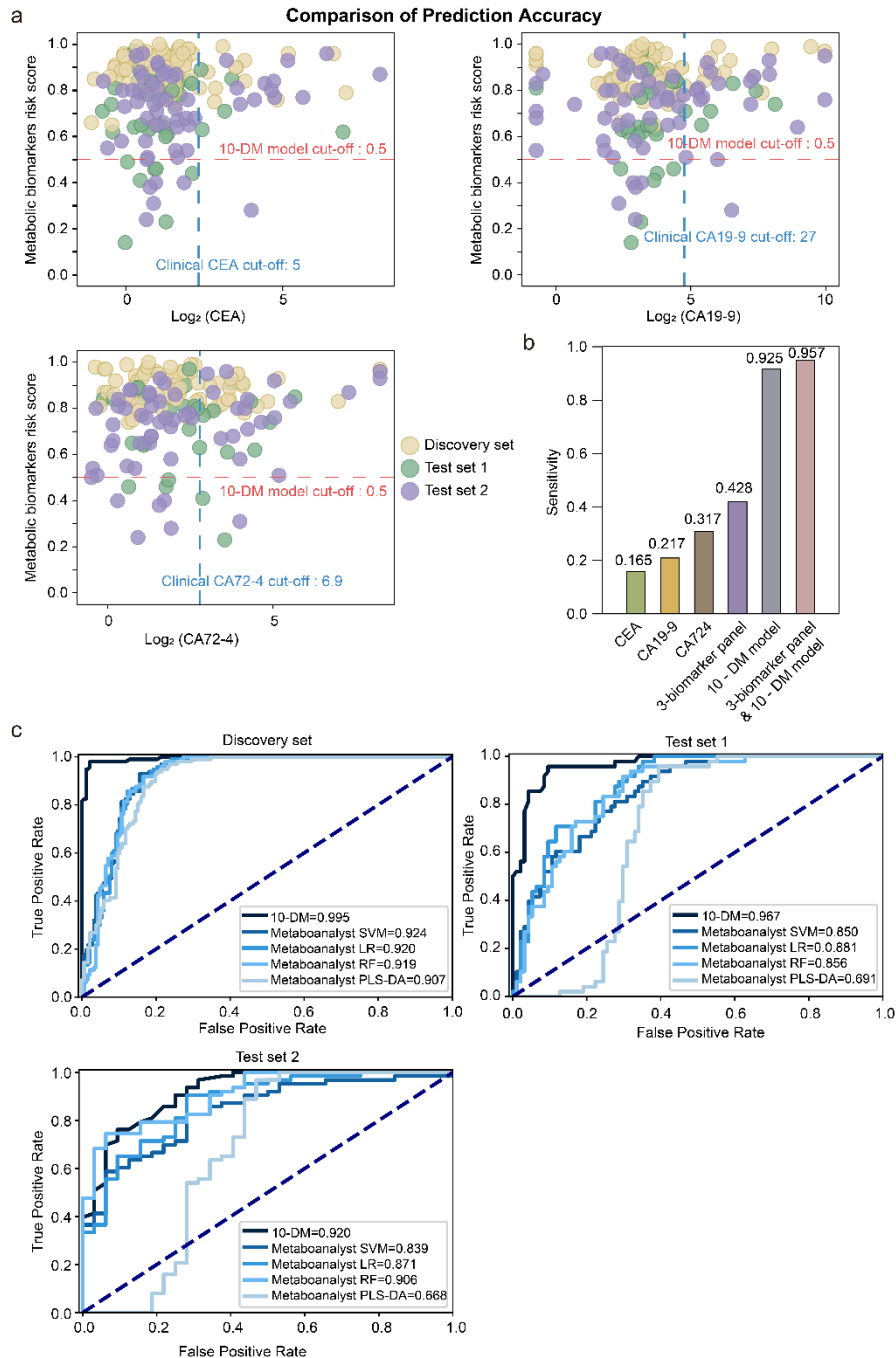

**Supplementary Fig. 4 | Diagnostic accuracy comparison of the 10-DM model and clinical markers.**

**a**, Diagnostic prediction of the GC patients using the 10-DM model and clinical markers respectively. The discovery set, test set 1 and 2 GC patients were colored in yellow, green, and purple respectively. The blue dotted line represents the log2 cutoff value of each marker, while the red dotted line represents the cutoff value of the 10-DM model. **b**, Comparison of different markers and models' detection sensitivity in predicting GC patients. CEA, carcinoembryonic antigen; CA19-9, carbohydrate

antigen 19-9; CA724, carbohydrate antigen 724. **c**, The AUROC curves for the 10-DM model and various machine learning models constructed using Metaboanalyst are depicted for the discovery set, test set 1 and test set 2.



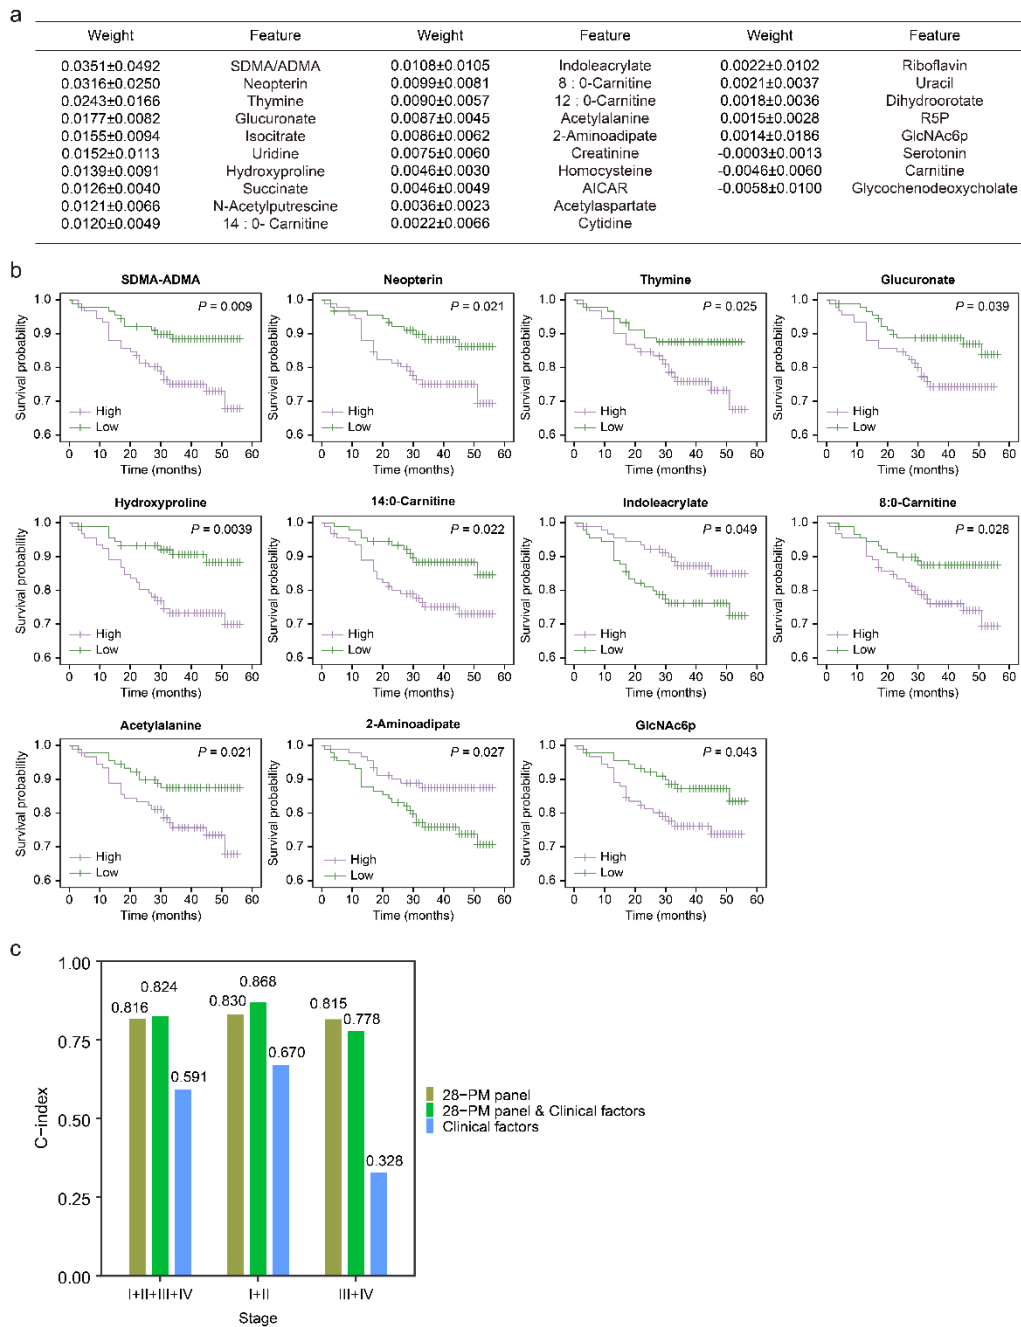

**Supplementary Fig. 5 | Characteristics of the 28-PM model.**

**a**, Weights of the 28 metabolic features in the 28-PM model. **b**, Kaplan–Meier curves for the overall survival of test set GC patients stratified by 28-PM model metabolites with a two-sided log-rank test. The patients were divided into high and low groups by the median of the metabolite abundances in GC patients. **c**, C-index comparison of models, including the 28-PM model, the 28-PM panel integrated with clinical factors, and clinical factors, for predicting the prognosis of GC patients at different stages.

**Table S1 Characteristics of the clinical parameters that were not significantly associated with GC patients' prognosis.** Univariate Cox regression analysis was performed on clinical parameters to identify those with significant prognostic correlations. Parameters with  $P > 0.05$  are considered statistically insignificant, indicating a lack of significant association with the prognosis of GC patients. The hazard ratio, 95% CI (Confidence interval) and P value were calculated by univariate Cox regression analysis. GAC, Gastric adenocarcinoma; SRCC, Gastric signet-ring cell carcinoma; dMMR, deficient Mismatch repair.

| Characteristics                  | Classificatio     | Frequency    | P value | Hazard ratio | 95% CI       |
|----------------------------------|-------------------|--------------|---------|--------------|--------------|
| Sex                              | Male              | 114 (62.98%) |         | Reference    |              |
|                                  | Female            | 67 (37.02%)  | 0.621   | 0.84         | 0.42 - 1.69  |
| Age (years)                      | <40               | 10 (5.52%)   |         | Reference    |              |
|                                  | 41-50             | 31 (17.13%)  | 0.918   | 1.09         | 0.22 - 5.39  |
|                                  | 51-60             | 54 (29.83%)  | 0.934   | 0.94         | 0.20 - 4.34  |
|                                  | 61-70             | 63 (34.81%)  | 0.951   | 0.95         | 0.21 - 4.30  |
|                                  | >70               | 23 (12.71%)  | 0.494   | 1.73         | 0.36 - 8.34  |
| Tumor size (cm)                  | <2.5              | 37 (20.44%)  |         | Reference    |              |
|                                  | 2.5-5             | 91 (50.28%)  | 0.650   | 1.26         | 0.46 - 3.48  |
|                                  | >5                | 53 (29.28%)  | 0.090   | 2.40         | 0.87 - 6.61  |
| Anatomic region                  | Cardia            | 13 (7.18%)   |         | Reference    |              |
|                                  | Fundus            | 4 (2.21%)    | 0.787   | 1.39         | 0.13 - 15.36 |
|                                  | Body              | 33 (18.23%)  | 0.744   | 1.30         | 0.27 - 6.26  |
|                                  | Body-antrum       | 35 (19.34%)  | 0.679   | 0.70         | 0.13 - 3.82  |
|                                  | Antrum            | 80 (44.2%)   | 0.934   | 1.06         | 0.24 - 4.69  |
|                                  | Pylorus           | 2 (1.10%)    | 0.261   | 3.96         | 0.36 - 43.87 |
|                                  | Total             | 2 (1.10%)    | 0.244   | 4.17         | 0.38 - 46.22 |
|                                  | Complex           | 12 (6.63%)   | 0.180   | 3.09         | 0.60 - 16.01 |
| Transverse axis                  | Anterior wall     | 16 (9.82%)   |         | Reference    |              |
|                                  | Posterior wall    | 15 (9.20%)   | 0.543   | 0.47         | 0.04 - 5.23  |
|                                  | Lesser curvature  | 74 (45.40%)  | 0.488   | 1.69         | 0.39 - 7.38  |
|                                  | Greater curvature | 15 (9.20%)   | 0.675   | 1.47         | 0.24 - 8.78  |
|                                  | Circumferential   | 20 (12.27%)  | 0.367   | 2.13         | 0.41 - 10.97 |
| Histopathological classification | Cross             | 23 (14.11%)  | 0.341   | 0.31         | 0.03 - 3.43  |
|                                  | GAC               | 138 (78.41%) |         | Reference    |              |
|                                  | GAC with SRC      | 34 (19.32%)  | 0.662   | 1.19         | 0.54 - 2.62  |
|                                  | SRCC              | 4 (2.27%)    | 0.977   | -            | -            |
| Lauren type                      | Intestinal        | 48 (27.43%)  |         | Reference    |              |
|                                  | Diffuse           | 73 (41.71%)  | 0.205   | 1.84         | 0.72 - 4.69  |
|                                  | Indeterminate     | 54 (30.86%)  | 0.147   | 2.05         | 0.78 - 5.38  |
| <i>H.pylori</i> infection        | No                | 37 (68.52%)  |         | Reference    |              |
|                                  | Yes               | 17 (31.48%)  | 0.891   | 1.13         | 0.21 - 6.20  |
| dMMR                             | No                | 149 (87.13%) |         | Reference    |              |
|                                  | Yes               | 22 (12.87%)  | 0.207   | 0.40         | 0.10 - 1.66  |
| Adjuvant chemotherapy            | No                | 44 (33.59%)  |         | Reference    |              |
|                                  | Yes               | 87 (66.41%)  | 0.383   | 1.51         | 0.60 - 3.80  |
